# Supplementary material
Source: PubMed Central journal article supplement (PMC2490787)
Supplement: M803023200_1.pdf [file M803023200_1.pdf]

## Supplementary Information for Johnston *et al.*

### SI Movies

Time-lapse DIC microscopy of one-cell stage embryos was recorded during anaphase from the following genotypes: wildtype at 16°C (**Movie 1**), *gpa-16*(RNAi) at 16°C (**Movie 2**), *gpa-16(it143)* at 25°C (**Movie 3**), *gpa-16(it143)* at 16°C (**Movie 4**), *gpa-16(it143)/goa-1*(RNAi) at 16°C (**Movie 5**), *gpa-16(it143)/goa-1*(RNAi) at 25°C (**Movie 6**). Frames were captured every 5 seconds and the movies are played at 10 frame per second. Embryos are oriented with anterior to the left and posterior to the right in all the movies.
