# Supplementary material
Source: PubMed Central journal article supplement (PMC2490787)
Supplement: M803023200_2.pdf [file M803023200_2.pdf]

**Supplementary Table 1. Data collection and refinement statistics**

|                                                   |                       |
|---------------------------------------------------|-----------------------|
| <b>Data collection (highest resolution shell)</b> |                       |
| Space group                                       | I4                    |
| No. molecules in asymmetric unit                  | 1                     |
| Unit cell dimensions                              |                       |
| <i>a, b, c</i> (Å)                                | 121.87, 121.87, 67.35 |
| $\alpha, \beta, \gamma$ (degrees)                 | 90, 90, 90            |
| Wavelength (Å)                                    | 1.54                  |
| Resolution (Å)                                    | 50-2.24 (2.32-2.24)   |
| Linear R-factor <sup>a</sup>                      | 5.9 (21.1)            |
| Square R-factor <sup>b</sup>                      | 5.1 (20.7)            |
| Mean $I/\sigma$ <sup>c</sup>                      | 56.8 (14.4)           |
| Completeness (%)                                  | 99.5 (95.4)           |
| Redundancy                                        | 7.3 (7.2)             |
| <b>Refinement</b>                                 |                       |
| Resolution (Å)                                    | 20-2.24 (2.32-2.24)   |
| Reflections (working/test)                        | 19436/974             |
| R-cryst/R-free (%) <sup>d</sup>                   | 22.9/23.6             |
| Non-hydrogen atoms                                |                       |
| Protein                                           | 2497                  |
| GDP/SO <sub>4</sub>                               | 28/5                  |
| Water                                             | 246                   |
| R.m.s. deviations                                 |                       |
| Bonds                                             | 0.0072                |
| Angles                                            | 1.15                  |
| Average B-factor                                  | 32.6                  |
| Ramachandran plot (%)                             |                       |
| Most-favored regions                              | 91.7                  |
| Allowed regions                                   | 8.3                   |
| Disallowed regions                                | 0.0                   |

<sup>a</sup>Linear R =  $\sum(|I - \langle I \rangle|) / \sum(I)$

<sup>b</sup>Square R =  $\sum(I - \langle I \rangle)^2 / \sum(I)^2$

<sup>c</sup> $\langle I/\sigma \rangle$ , Mean signal to noise, where  $I$  is the integrated intensity of a measured reflection and  $\sigma$  is the estimated error in the measurement

<sup>d</sup> $\sum |F_P - F_{P(\text{calc})}| / \sum F_P$ , where  $F_P$  and  $F_{P(\text{calc})}$  are the observed and calculated structure factor amplitudes, respectively. R-free is calculated similarly using test set reflections never used during refinement

## Supplementary Table 2.

### Peak spindle pole velocities from spindle severing experiments

| genotype                                          | n  | A<br>( $\mu\text{m}/\text{sec}$ ) | P<br>( $\mu\text{m}/\text{sec}$ ) | versus wild-type, 25°C |                      | versus wild-type, 16°C |                      |
|---------------------------------------------------|----|-----------------------------------|-----------------------------------|------------------------|----------------------|------------------------|----------------------|
|                                                   |    |                                   |                                   | (A)                    | (P)                  | (A)                    | (P)                  |
| wild-type, 25°C                                   | 13 | 0.64 $\pm$ 0.07 <sup>1</sup>      | 1.03 $\pm$ 0.08 <sup>1</sup>      | -                      | -                    | P<0.001                | P<0.001              |
| wild-type, 16°C                                   | 12 | 0.56 $\pm$ 0.06                   | 0.80 $\pm$ 0.07                   | P<0.001                | P<0.001              | -                      | -                    |
| <i>gpa-16(RNAi)</i> , 25°C                        | 15 | 0.60 $\pm$ 0.07 <sup>1</sup>      | 0.65 $\pm$ 0.07 <sup>1</sup>      | P~0.1                  | P<0.001              | ND                     | ND                   |
| <i>gpa-16(RNAi)</i> , 16°C                        | 10 | 0.32 $\pm$ 0.05                   | 0.38 $\pm$ 0.06                   | ND                     | ND                   | P<0.001                | P<0.001              |
| <i>goa-1(RNAi)</i> , 25°C                         | 8  | 0.50 $\pm$ 0.09                   | 0.80 $\pm$ 0.12                   | P<0.001 <sup>2</sup>   | P<0.001 <sup>2</sup> | ND                     | ND                   |
| <i>goa-1(RNAi)</i> , 16°C                         | 8  | 0.34 $\pm$ 0.05                   | 0.46 $\pm$ 0.06                   | ND                     | ND                   | P<0.001                | P<0.001              |
| <i>goa-1(RNAi)</i><br><i>gpa-16(RNAi)</i> , 25°C  | 15 | 0.21 $\pm$ 0.04 <sup>3</sup>      | 0.22 $\pm$ 0.03 <sup>3</sup>      | P<0.001 <sup>3</sup>   | P<0.001 <sup>3</sup> | ND                     | ND                   |
| <i>goa-1(RNAi)</i><br><i>gpa-16(it143)</i> , 25°C | 9  | 0.18 $\pm$ 0.05                   | 0.24 $\pm$ 0.05                   | P<0.001                | P<0.001              | ND                     | ND                   |
| <i>gpa-16(it143)</i> , 25°C                       | 10 | 0.58 $\pm$ 0.07 <sup>2</sup>      | 0.65 $\pm$ 0.09 <sup>2</sup>      | P~0.1                  | P<0.001              | P<0.001 <sup>2</sup>   | P<0.001 <sup>2</sup> |
| <i>gpa-16(it143)</i> , 16°C                       | 11 | 0.67 $\pm$ 0.06                   | 0.81 $\pm$ 0.10                   | ND                     | ND                   | P>0.5                  | P<0.001              |
| <i>goa-1(RNAi)</i><br><i>gpa-16(it143)</i> , 16°C | 9  | 0.16 $\pm$ 0.05                   | 0.25 $\pm$ 0.05                   | ND                     | ND                   | P<0.001                | P<0.001              |

Average peak velocities of the anterior (A) and posterior (P) spindle poles were determined as described in Experimental Procedures ;  $\pm$  corresponds to standard deviation

<sup>1</sup> From Afshar *et al.* (2004) *Cell*, vol. 119, pgs. 219-230.

<sup>2</sup> From Afshar *et al.* (2005) *Development*, vol. 132, pgs. 4449-4459.

<sup>3</sup> From Colombo *et al.* (2003) *Science*, vol. 300, pgs. 1957-1961.
